# Supplementary material
Source: PubMed Central journal article supplement (PMC10686078)

Tree scale: 1

**Label**

- Dalangtan Playa
- Antarctic Desert
- Other Harsh Environments
- Others

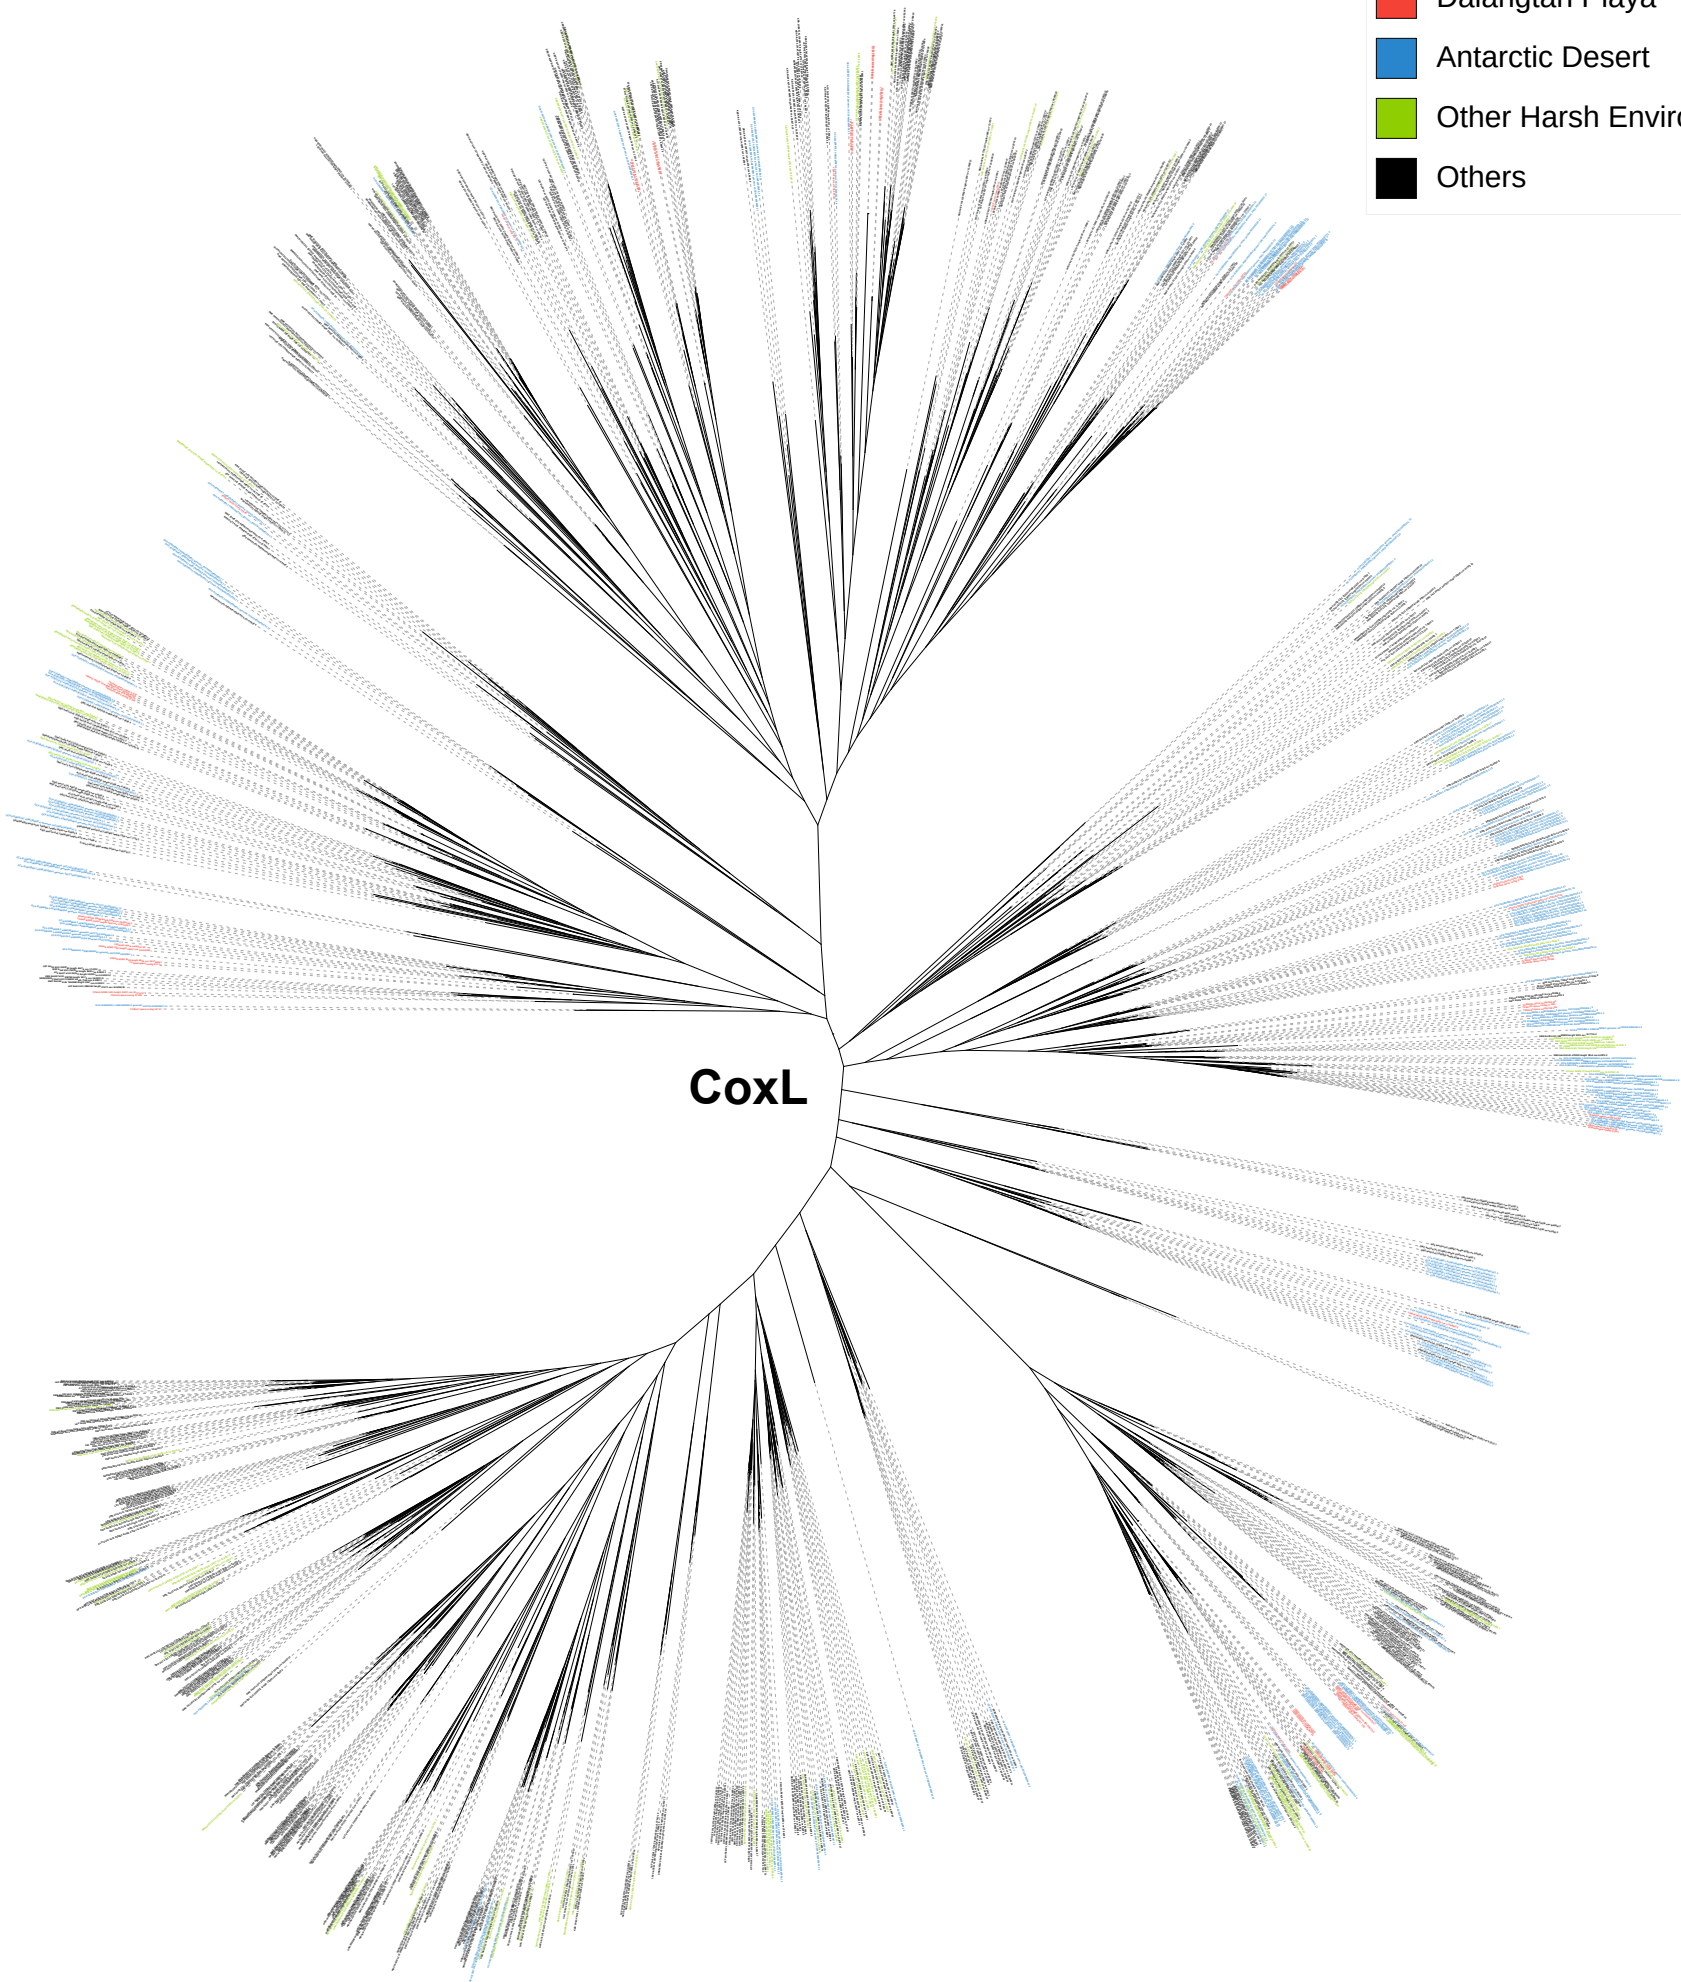

Supplement: aem.01072-23-s0002.pdf [file aem.01072-23-s0002.pdf]
